# Supplementary material for: A novel neuroprotective peptide YVYAETY identified and screened fromFlammulina velutipesprotein hydrolysates attenuates scopolamine-induced cognitive impairment in mice
Source: Royal Society of Chemistry journal article supplement (doi:10.1039/d4fo00871e), 2024-01-01
Supplement: d4fo00871e1.pdf [file d4fo00871e1.pdf]

1 **Supplementary material**

2 **Table S1.** Identified peptides from fraction FVPH-III-2 with a ALC value  $\geq 98\%$ .

3 **Table S2.** Primer sequences used for qRT-PCR analysis.

4 **Fig. S1.** Total ion chromatogram of the FVPH-III-2 fraction.

5 **Fig. S2.** Effects of  $A\beta_{25-35}$  with different concentrations on cell viability in HT22 cells.

6 The data were expressed as mean  $\pm$  SD ( $n=3$ ). Different letters indicate significant  
7 statistical differences ( $P < 0.05$ ).

8

9 **Table S1** Identified peptides from fraction FVPH-III-2 with a ALC value $\geq$ 98%.

| Peptide    | Mass    | Log (peak area) | ALC (%) |
|------------|---------|-----------------|---------|
| SDLKPADF   | 891.43  | 7.37            | 98      |
| WNDHYY     | 896.35  | 6.34            | 99      |
| YVYAETY    | 907.40  | 6.18            | 98      |
| WFHPLF     | 845.42  | 6.09            | 98      |
| TPFHPLYL   | 930.46  | 5.55            | 98      |
| YADVGPGGY  | 897.39  | 5.50            | 99      |
| DLLNHPADLK | 1134.60 | 5.24            | 98      |
| WDDHYY     | 897.33  | 5.09            | 98      |
| LSVGPPTY   | 832.43  | 5.08            | 98      |
| DFNKPGE    | 805.36  | 4.87            | 98      |
| ATGHYPGY   | 864.38  | 4.82            | 98      |
| WLLDQGK    | 858.46  | 4.75            | 98      |
| YAWVLDK    | 893.46  | 4.65            | 98      |

10

11 **Table S2.** Primer sequences used for qRT-PCR analysis.

|              | forward 5'-3'          | reverse 3'-5'            |
|--------------|------------------------|--------------------------|
| <i>NGF</i>   | CGACTCCAAACACTGGAACTCA | GCCTGCTTCTCATCTGTTGTCA   |
| <i>HO-1</i>  | ATGTGGCCCTGGAGGAGGAGA  | CGCTGCATGGCTGGTGTGTAG    |
| <i>NQO-1</i> | GGATTGGACCGAGCTGGAA    | AATTGCAGTGAAGATGAAGGCAAC |
| <i>GADPH</i> | TGGAGAAACCTGCCAAGTATGA | TGGAAGAATGGGAGTTGCTGT    |

12

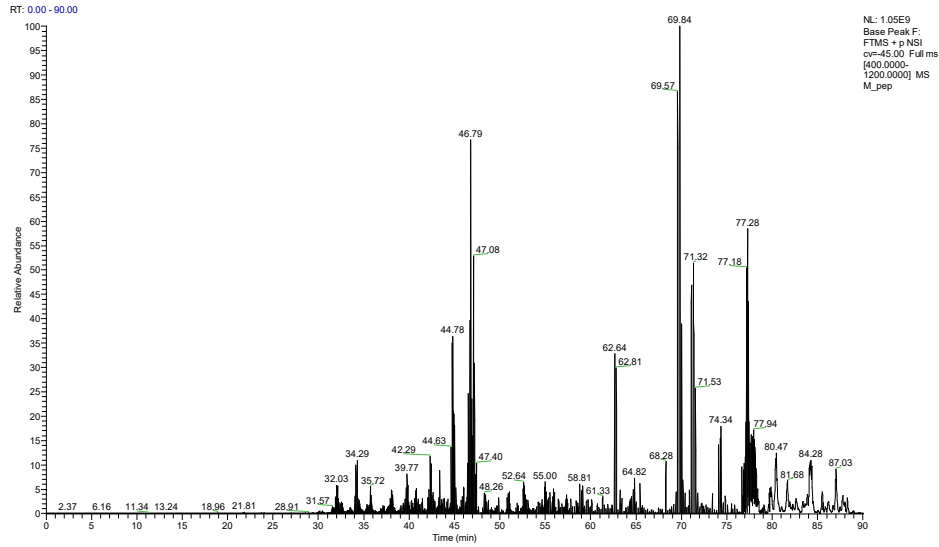

13

14 **Fig. S1.** Total ion chromatogram of the FVPH-III-2 fraction.

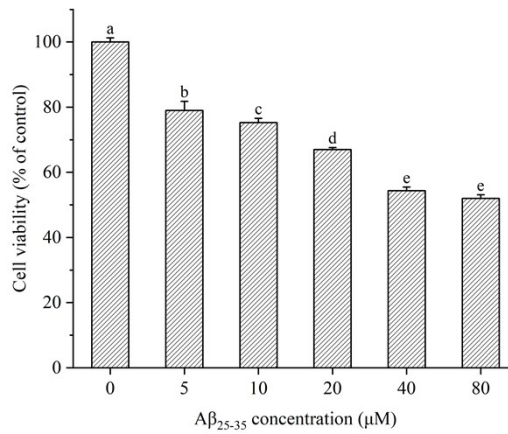

15

16 **Fig. S2.** Effects of A $\beta_{25-35}$  with different concentrations on cell viability in HT22 cells.

17 The data were expressed as mean  $\pm$  SD ( $n=3$ ). Different letters indicate significant

18 statistical differences ( $P < 0.05$ ).
